# Supplementary material for: Spectroscopic studies of the color modulation mechanism of firefly (beetle) bioluminescence with amino-analogs of luciferin and oxyluciferin
Source: Royal Society of Chemistry journal article supplement (doi:10.1039/c2pp25106j), 2012-05-28
Supplement: c2pp25106j.pdf [file c2pp25106j.pdf]

## Supplementary Information

### **Spectroscopic studies of the color modulation mechanism of firefly (beetle) bioluminescence with amino-analogs of luciferin and oxyluciferin**

Takashi Hirano,<sup>\*a</sup> Hiroyuki Nagai,<sup>a</sup> Takuto Mastuhashi,<sup>a</sup> Yosuke Hasumi,<sup>a</sup>  
Satoshi Iwano,<sup>a</sup> Kazuto Ito,<sup>a</sup> Shojiro Maki,<sup>a</sup> Haruki Niwa<sup>a</sup> and Vadim R. Viviani<sup>b</sup>

<sup>a</sup> *Department of Engineering Science, Graduate School of Informatics and Engineering,  
The University of Electro-Communications, Chofu, Tokyo 182-8585, Japan.*

<sup>b</sup> *Laboratorio de Bioquímica e Biotecnologia de Sistemas Bioluminescentes, Universidade  
Federal de São Carlos, Campus de Sorocaba (UFSCAR), Sorocaba, São Paulo, Brazil.*

\*Tel.: +81-42-443-5489; e-mail: hirano@pc.uec.ac.jp

## 1. General methods

Melting points were obtained with a Yamato MP-21 apparatus. IR spectra were measured with a Horiba FT-720 spectrometer. Electron ionization (EI) mass spectra and high-resolution electro-spray ionization (ESI) mass spectra were recorded with a JEOL JMS-600 and JEOL JMS-T100LC mass spectrometers, respectively.  $^1\text{H}$  NMR spectra were recorded on a JEOL ECA-500 (500 MHz) instrument. UV/visible absorption spectra were measured with a Varian Cary 50 spectrophotometer (scan speed, 600 nm/min; data interval, 1 nm). Fluorescence spectra were measured with a JASCO FP-6500 fluorescence spectrophotometer (excitation and emission bandpasses, 3 and 10 nm, respectively; scan speed, 500 nm/min) and were corrected according to manufacturer's instructions. Fluorescence quantum yields were determined relative to quinine sulfate in 0.10 M  $\text{H}_2\text{SO}_4$  ( $\Phi_{\text{F}} = 0.55$ ,  $\lambda_{\text{ex}} 366$  nm) as the standard.<sup>1</sup> Bioluminescence intensities were measured using an ATTO AB-2200 luminometer, and bioluminescence spectra were measured with an ATTO AB-1850 spectrophotometer (data interval, 1 nm). Spectroscopic measurements were made in a quartz cuvette (1 cm path length) at  $25 \pm 1$  °C. Spectral-grade solvents were used for measurements of UV/visible absorption and fluorescence. Quantum chemical calculations were performed on the Gaussian 09 program.<sup>2</sup> We used density functional theory (DFT): Beck's three-parameter functional combined with Lee, Yang and Parr's correlation functional (B3LYP) along with 6-31+G(d) basis set.<sup>3-5</sup> Molecular graphics were made using GaussView, Version 5.<sup>6</sup>

## 2. Syntheses of luciferin and oxyluciferin analogs

**2.1 Preparations of 5,5-dimethyloxyluciferin analogs.** Oxyluciferin analogs **1-NH<sub>2</sub>**, **1-NMe<sub>2</sub>**, and **1-H** were prepared by the procedure shown in Scheme S1.

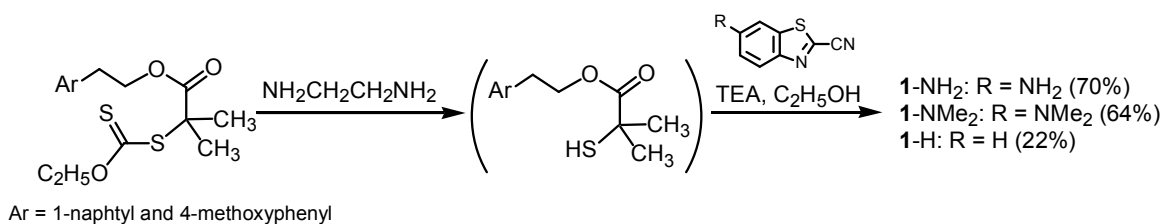

**Scheme S1** Syntheses of **1-NH<sub>2</sub>**, **1-NMe<sub>2</sub>**, and **1-H**.

**Synthesis of 1-NH<sub>2</sub>.** *O*-Ethyl *S*-[2-[2-(1-naphtyl)ethoxycarbonyl]-2-propyl]dithiocarbonate<sup>7</sup> (145 mg, 0.40 mmol) was dissolved in ethylenediamine (2.2 mL) under Ar, and the reaction mixture was stirred at room temperature for 2 h. The reaction was quenched by the addition of saturated NH<sub>4</sub>Cl aqueous solution and 2-(1-naphtyl)ethyl 2-mercaptoisobutyrate was extracted with ether (20 mL × 3). The organic layer was washed with brine, dried over Na<sub>2</sub>SO<sub>4</sub> and concentrated in vacuo. The residue containing mercaptoisobutyrate (137 mg) was dissolved in ethanol (2 mL) under Ar and 6-amino-2-cyanobenzothiazol<sup>8,9</sup> (50 mg, 0.29 mmol) and triethylamine (60 μL, 0.43 mmol) was added to the solution. After heating at reflux for 6 h, the mixture was cooled to room temperature and concentrated in vacuo. The residue was purified by TLC (SiO<sub>2</sub>, CHCl<sub>3</sub>/hexane/ethyl acetate) twice, to give **1-NH<sub>2</sub>** (55 mg, 70%) as red powder: mp. 214–216 °C. IR (KBr): 3438, 3452, 3230, 1707, 1637, 1608, 1543 cm<sup>-1</sup>; <sup>1</sup>H NMR (CDCl<sub>3</sub>, 500 MHz) δ (ppm): 1.77 (6 H, s), 4.19 (2 H, br s), 6.93 (1 H, dd, *J* = 2.3, 9.2 Hz), 7.13 (1 H, d, *J* = 2.2 Hz), 7.98 (1H, d, *J* = 9.2 Hz); MS EI *m/z* (%) 277 (M<sup>+</sup>, 100), 193 (54), 175 (49); HRMS ESI: calcd for C<sub>12</sub>H<sub>12</sub>N<sub>3</sub>OS<sub>2</sub> [M+H]<sup>+</sup>, 278.0422; found, 278.0433.

**1-NMe<sub>2</sub>.** Preparation with *O*-ethyl *S*-[2-[2-(1-naphtyl)ethoxycarbonyl]-2-propyl]dithiocarbonate<sup>7</sup> and 2-cyano-6-(dimethylamino)benzothiazol<sup>8,9</sup> with the similar procedure for **1-NH<sub>2</sub>** gave **1-NMe<sub>2</sub>** (64% yield) as red powder: mp. 195–198 °C. IR (KBr): 2970, 1925, 2860, 2808, 1716, 1608, 1545, 1508 cm<sup>-1</sup>; <sup>1</sup>H NMR (CDCl<sub>3</sub>, 500 MHz) δ (ppm): 1.73 (6 H, s), 3.13 (6 H, s), 7.05 (1 H, dd, *J* = 2.3, 8.1 Hz), 7.06 (1 H, brs), 8.02 (1H, dd, *J* = 2.3, 8.0 Hz); MS EI *m/z* (%) 305 (M<sup>+</sup>, 100), 221 (58), 203 (35); HRMS ESI: calcd for C<sub>14</sub>H<sub>16</sub>N<sub>3</sub>OS<sub>2</sub> [M+H]<sup>+</sup>, 306.0735; found, 306.0721.

**1-H.** Preparation with *O*-ethyl *S*-[2-[2-(4-methoxyphenyl)ethoxycarbonyl]-2-propyl] dithiocarbonate<sup>7</sup> and 2-cyanobenzothiazol<sup>10</sup> with the similar procedure for **1-NH<sub>2</sub>** gave **1-H** (22% yield) as yellow powder: mp. 148–149 °C. IR (KBr): 2970, 2927, 2866, 1722, 1521 cm<sup>-1</sup>; <sup>1</sup>H NMR (CDCl<sub>3</sub>, 270 MHz) δ (ppm): 1.76 (6 H, s), 7.59 (1 H, dt, *J* = 1.2, 7.5 Hz), 7.63 (1 H, dt, *J* = 1.2, 7.5 Hz), 8.04 (1 H, dd, *J* = 1.2, 6.9 Hz), 8.24 (1H, dd, *J* = 1.2, 7.4 Hz); MS EI *m/z* (%) 262 (M<sup>+</sup>, 100), 247 (32), 178 (44); HRMS ESI: calcd for C<sub>12</sub>H<sub>11</sub>N<sub>2</sub>OS<sub>2</sub> [M+H]<sup>+</sup>, 263.0313; found, 263.0349.

## 2.2 Syntheses of aminoluciferin (ALH) and 5,5-dimethylaminoluciferin (Me<sub>2</sub>ALH).

Aminoluciferin (ALH) was prepared by the reported procedure.<sup>8,9</sup>

**Synthesis of Me<sub>2</sub>ALH.** To a solution of 6-amino-2-cyanobenzothiazol<sup>8,9</sup> (15 mg, 87 μmol) in methanol (3 mL) was added a solution of D-penicillamine (42 mg, 0.27 mmol) in 50 mM sodium phosphate buffer (pH 8, 3 mL) under Ar, and the reaction mixture was stirred at room temperature for 4 h. The reaction mixture was diluted with 50 mM sodium phosphate buffer (pH 8, 40 mL) and washed with ethyl acetate (30 mL × 3). The aqueous layer was acidified to pH 4 by adding 1 M HCl and the product was extracted with ethyl acetate (50 mL × 3). The organic layer was dried over Na<sub>2</sub>SO<sub>4</sub> and concentrated in vacuo. The residue was washed with hexane, to give Me<sub>2</sub>ALH (15 mg, 60%) as red powder: mp. 134–136 °C. IR (KBr): 3361, 3230, 2970, 2927, 2871, 1724, 1577 cm<sup>-1</sup>; <sup>1</sup>H NMR (DMSO-*d*<sub>6</sub>, 500 MHz) δ (ppm): 1.43 (3 H, s), 1.71 (3 H, s), 4.93 (1 H, s), 5.83 (2 H, br s), 6.85 (1 H, dd, *J* = 2.3, 8.6 Hz), 7.07 (1 H, d, *J* = 2.3 Hz), 7.75 (1H, d, *J* = 8.5 Hz); MS EI *m/z* (%) 307 (M<sup>+</sup>, 10), 263 (100), 248 (85), 189 (85); HRMS ESI: calcd for C<sub>13</sub>H<sub>14</sub>N<sub>3</sub>O<sub>2</sub>S<sub>2</sub> [M+H]<sup>+</sup>, 308.0527; found, 308.0535.

## 3. <sup>1</sup>H-NMR Spectra

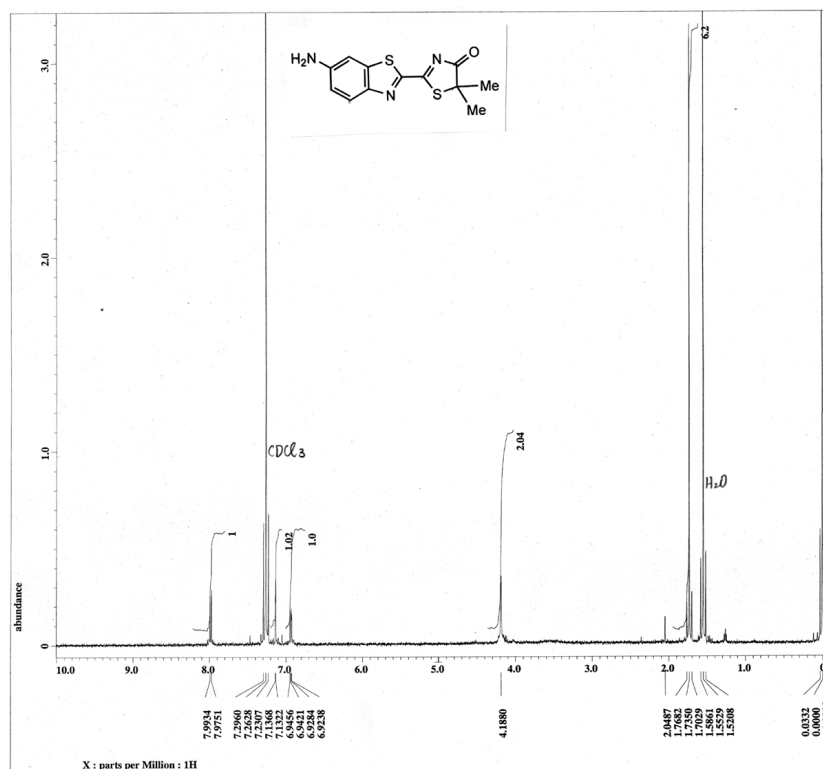

Fig. S1 <sup>1</sup>H NMR spectrum of 1-NH<sub>2</sub> in CDCl<sub>3</sub>.

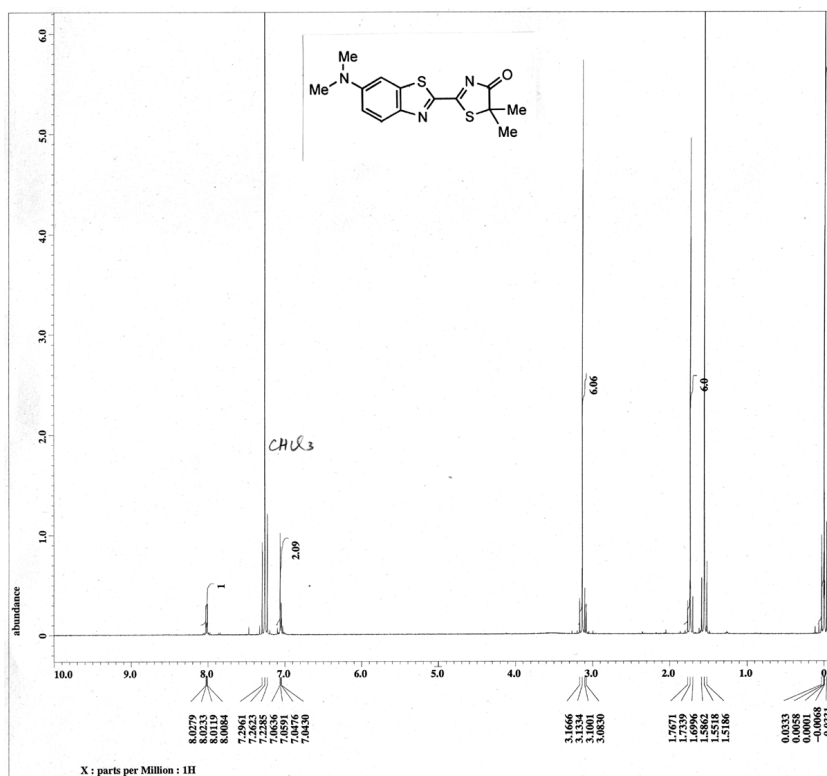

Fig. S2 <sup>1</sup>H NMR spectrum of 1-NMe<sub>2</sub> in CDCl<sub>3</sub>.

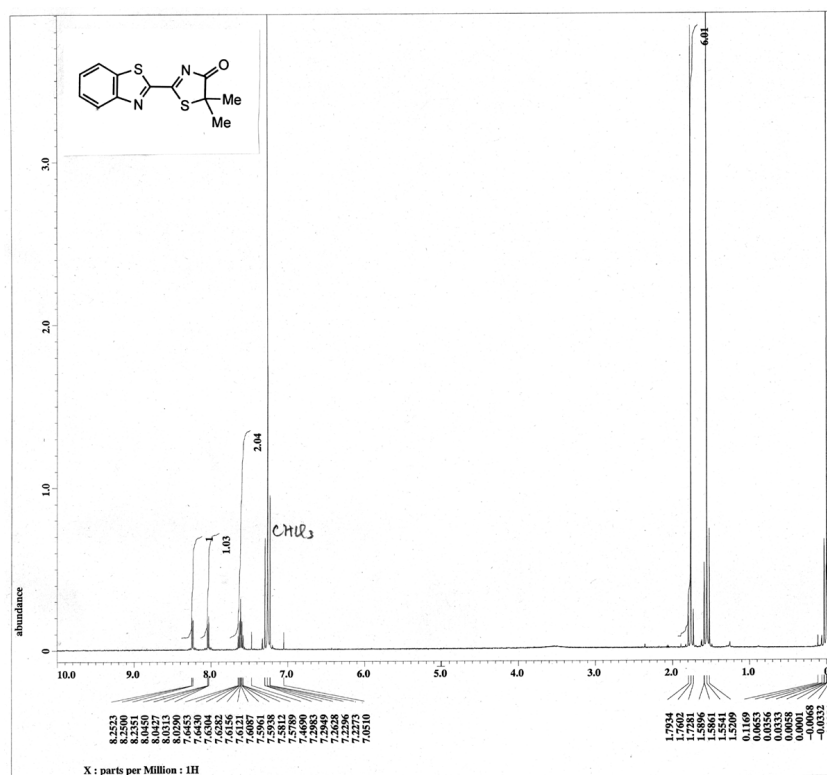

Fig. S3 <sup>1</sup>H NMR spectrum of 1-H in CDCl<sub>3</sub>.

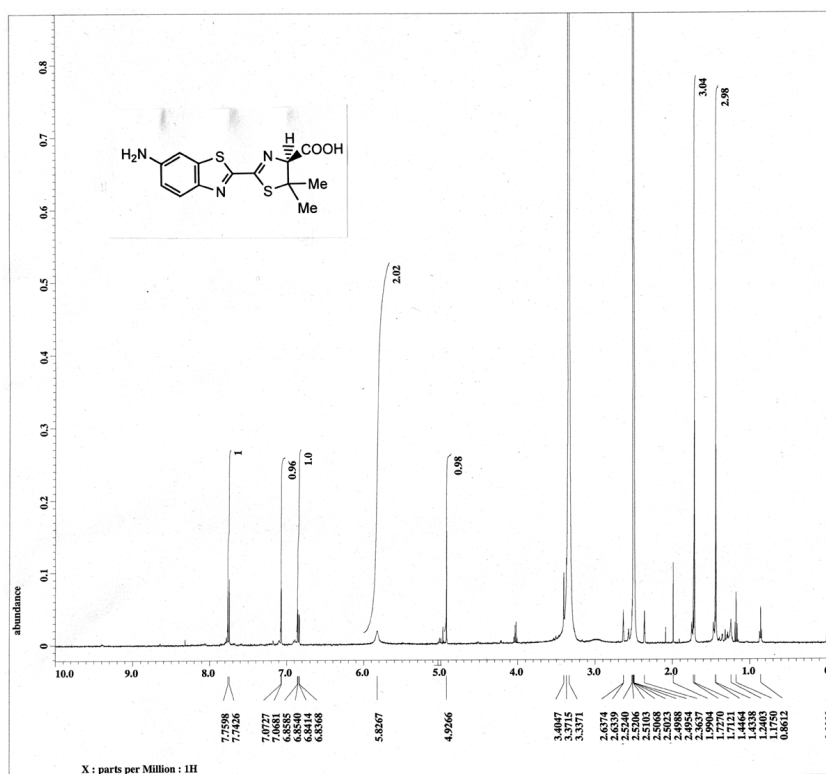

**Fig. S4** <sup>1</sup>H NMR spectrum of Me<sub>2</sub>ALH in DMSO-*d*<sub>6</sub>.

#### 4. Measurements of bioluminescence emission intensities and spectra

Intensities of light emission by L-L reactions of LH<sub>2</sub>, ALH, and Me<sub>2</sub>ALH with a recombinant *Photinus pyralis* (Ppy) luciferase (QuantiLum recombinant luciferase, Promega, USA) and ATP magnesium salt (Mg·ATP) (Sigma, USA) were measured with the AB-2200 luminometer. The assays were performed by adding 40 μL of a Mg·ATP aqueous solution to a mixture (60 μL) of luciferin (and its analogs) and Ppy luciferase in potassium phosphate buffer (0.1 M, pH 5.0 and 8.0) at room temperature. Final concentrations were as followed: 80 μM Mg·ATP, 20 μM luciferin (and its analogs), and 30 nM Ppy luciferase. All assays were measured in triplicate. Relative intensities for bioluminescence of LH<sub>2</sub>, ALH, and Me<sub>2</sub>ALH were shown below.

|        | relative intensity of bioluminescence |      |                     |
|--------|---------------------------------------|------|---------------------|
|        | LH <sub>2</sub>                       | ALH  | Me <sub>2</sub> ALH |
| pH 8.0 | 1.0                                   | 0.13 | 0.0010              |
| pH 5.0 | 1.0                                   | 0.90 | 0.0030              |

Bioluminescence spectra were measured with the AB-1850 spectrophotometer. Spectra for the L-L reactions of LH<sub>2</sub> and ALH with Ppy luciferase were measured in potassium phosphate buffer (0.1 M, pH 5.0 and 8.0) containing 80 μM Mg·ATP, 20 μM LH<sub>2</sub> and ALH, and 0.3 μM Ppy luciferase at room temperature. To measure bioluminescence spectra for Me<sub>2</sub>ALH, the concentrations of Me<sub>2</sub>ALH (100 μM) and Ppy (3 μM) were increased.

## 5. Spectroscopic data

**Table S1** Electronic absorption of **1** in various solvents at 25 °C

| solvent [ <i>E</i> <sub>T</sub> (30) <sup>a</sup> ] | $\lambda_{\text{ab}} / \text{nm} (\epsilon / 10^4)^{\text{b}}$ |                   |                  |                   |                     |                    |
|-----------------------------------------------------|----------------------------------------------------------------|-------------------|------------------|-------------------|---------------------|--------------------|
|                                                     | 1-NMe <sub>2</sub>                                             | 1-NH <sub>2</sub> | 1-H              | 1-OH <sup>c</sup> | 1-O <sup>-c,d</sup> | 1-OMe <sup>c</sup> |
| <i>p</i> -xylene [33.1]                             | 464 (2.59)                                                     | 415 (2.01)        | 326 (1.69)       | 366 (1.85)        | ca. 500             | 368 (2.17)         |
| benzene [34.3]                                      | 468 (2.64)                                                     | 417 (2.03)        | 328 (1.84)       | 366 (1.95)        | ca. 500             | 371 (2.24)         |
| chloroform [39.1]                                   | 483 (2.63)                                                     | 422 (2.14)        | 330 (1.90)       | 370 (2.04)        | 503                 | 380 (2.12)         |
| DMSO [45.1]                                         | 491 (2.42)                                                     | 468 (2.39)        | 331 (1.74)       | 391 <sup>e</sup>  | 579                 | 380 (2.11)         |
| acetonitrile [45.6]                                 | 475 (2.50)                                                     | 433 (2.19)        | 325 (1.88)       | 372 (2.01)        | 565                 | 373 (2.14)         |
| 2-propanol [48.4]                                   | 479 (2.50)                                                     | 464 (2.24)        | 327 (1.85)       | 391 <sup>e</sup>  | 527                 | 380 (2.26)         |
| methanol [55.4]                                     | 485 (2.46)                                                     | 453 (2.23)        | 328 (1.86)       | 388 (1.93)        | 484                 | 378 (2.11)         |
| water [63.1]                                        | 513 <sup>d</sup>                                               | 436 <sup>d</sup>  | 326 <sup>d</sup> | --- <sup>f</sup>  | 484                 | 380 <sup>d</sup>   |

<sup>a</sup> *E*<sub>T</sub>(30) in kcal mol<sup>-1</sup>.

<sup>b</sup> Extinction coefficient in dm<sup>3</sup> mol<sup>-1</sup> cm<sup>-1</sup>.

<sup>c</sup> Ref 7.

<sup>d</sup> Initial concentrations of 1-OH and 1,1,3,3-tetramethylguanidine were 5.0 × 10<sup>-6</sup> and 0.010 mol dm<sup>-3</sup>, respectively.

<sup>e</sup> The  $\epsilon$  value was not determined accurately because of decomposition of the substrate.

<sup>f</sup> Generation of 1-O<sup>-</sup> was observed at the same time.

<sup>g</sup> Only generation of 1-O<sup>-</sup> was observed.

**Table S2** Fluorescence of **1** in various solvents at 25 °C.

| solvent [ <i>E</i> <sub>T</sub> (30) <sup>a</sup> ] | $\lambda_{\text{fl}} / \text{nm} (\Phi_{\text{F}})$ |                   |                      |                     |                    |
|-----------------------------------------------------|-----------------------------------------------------|-------------------|----------------------|---------------------|--------------------|
|                                                     | 1-NMe <sub>2</sub>                                  | 1-NH <sub>2</sub> | 1-OH <sup>b</sup>    | 1-O <sup>-b,c</sup> | 1-OMe <sup>b</sup> |
| <i>p</i> -xylene [33.1]                             | 535 (0.85)                                          | 494 (0.37)        | ca. 420 <sup>d</sup> | 563 (0.25)          | weak <sup>d</sup>  |
| benzene [34.3]                                      | 541 (0.90)                                          | 495 (0.48)        | ca. 420 <sup>d</sup> | 570 (0.25)          | 440 <sup>d</sup>   |
| chloroform [39.1]                                   | 567 (0.77)                                          | 511 (0.78)        | 454 (0.001)          | 601 (0.53)          | 454 (0.002)        |
| DMSO [45.1]                                         | 640 (0.31)                                          | 596 (0.76)        | 522 (0.07)           | 631 (0.51)          | 499 (0.008)        |
| acetonitrile [45.6]                                 | 621 (0.43)                                          | 567 (0.78)        | 479 (0.03)           | 624 (0.22)          | 478 (0.02)         |
| 2-propanol [48.4]                                   | 634 (0.38)                                          | 596 (0.65)        | 504 (0.11)           | 624 (0.27)          | 487 (0.02)         |
| methanol [55.4]                                     | 656 (0.11)                                          | 610 (0.36)        | 526 (0.19)           | 630 (0.10)          | 505 (0.12)         |
| water [63.1]                                        | 690 <sup>e</sup>                                    | 634 <sup>e</sup>  | --- <sup>f</sup>     | 637 <sup>e</sup>    | 535 <sup>e</sup>   |

<sup>a</sup> *E*<sub>T</sub>(30) in kcal mol<sup>-1</sup>.

<sup>b</sup> Ref 7.

<sup>c</sup> Initial concentrations of 1-OH and 1,1,3,3-tetramethylguanidine were 5.0 × 10<sup>-6</sup> and 0.010 mol dm<sup>-3</sup>, respectively.

<sup>d</sup> Quantum yield  $\Phi_{\text{F}}$  was lower than 0.001.

<sup>e</sup> The  $\Phi_{\text{F}}$  value was not determined accurately because of decomposition of the substrate.

<sup>f</sup> Only generation of 1-O<sup>-</sup> was observed.

## 6. DFT Calculation

**Table S3** Dipole moment ( $\mu$ ), HOMO and LUMO levels, the allowed transitions to the excited singlet states with the lowest excitation energies, their vertical excitation energies ( $E_{\text{ex}}$ ), excitation wavelengths ( $\lambda_{\text{ex}}$ ), oscillator strengths ( $f$ ) and configurations predicted for oxyluciferin analogs **1** with DFT and TDDFT using B3LYP/6-31+G(d)

| compd ( $\sigma_p$ )       | $\mu$ /D | HOMO /eV | LUMO /eV | transition                      | $E_{\text{ex}}$ / eV | $\lambda_{\text{ex}}$ / nm | $f$  | configuration <sup>a</sup>                         |
|----------------------------|----------|----------|----------|---------------------------------|----------------------|----------------------------|------|----------------------------------------------------|
| 1-NMe <sub>2</sub> (-0.83) | 7.8      | -5.75    | -2.70    | S <sub>0</sub> → S <sub>1</sub> | 2.83                 | 438                        | 0.55 | H → L (0.64)                                       |
| 1-NH <sub>2</sub> (-0.66)  | 6.5      | -6.13    | -2.80    | S <sub>0</sub> → S <sub>1</sub> | 3.09                 | 401                        | 0.49 | H → L (0.63),<br>H-1 → L (-0.13)                   |
| 1-H (0.00)                 | 4.1      | -7.00    | -3.05    | S <sub>0</sub> → S <sub>3</sub> | 3.65                 | 340                        | 0.14 | H-1 → L (-0.26),<br>H-2 → L (0.61)                 |
| 1-OH <sup>b</sup> (-0.37)  | 3.6      | -6.65    | -2.96    | S <sub>0</sub> → S <sub>2</sub> | 3.37                 | 367                        | 0.39 | H → L (0.66),<br>H-1 → L (0.24)                    |
| 1-OMe <sup>b</sup> (-0.27) | 4.5      | -6.52    | -2.90    | S <sub>0</sub> → S <sub>1</sub> | 3.32                 | 373                        | 0.42 | H → L (0.63),<br>H-1 → L (0.16)<br>H-2 → L (-0.25) |

<sup>a</sup> Configuration of excitation. H, H-*n* and L denote the HOMO, HOMO-*n* and LUMO, respectively.

<sup>b</sup> They have the conformations of the OH and OMe groups more stable than those reported in Ref 7.

**Table S4** Dipole moment ( $\mu$ ), HOMO and LUMO levels, the allowed transitions to the excited singlet states with the lowest excitation energies, their vertical excitation energies ( $E_{\text{ex}}$ ), excitation wavelengths ( $\lambda_{\text{ex}}$ ), oscillator strengths ( $f$ ) and configurations predicted for OLH and its analogs with DFT and TDDFT using B3LYP/6-31+G(d)

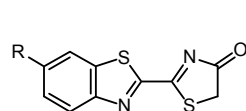

OLH: R = OH  
 OL-OMe: R = OMe  
 OL-NMe<sub>2</sub>: R = NMe<sub>2</sub>  
 OL-NH<sub>2</sub>: R = NH<sub>2</sub>  
 OL-H: R = H

| compd               | $\mu$ /D | HOMO /eV | LUMO /eV | transition                      | $E_{\text{ex}}$ / eV | $\lambda_{\text{ex}}$ / nm | $f$  | configuration <sup>a</sup>        |
|---------------------|----------|----------|----------|---------------------------------|----------------------|----------------------------|------|-----------------------------------|
| OL-NMe <sub>2</sub> | 8.6      | -5.80    | -2.76    | S <sub>0</sub> → S <sub>1</sub> | 2.82                 | 439                        | 0.53 | H → L (0.70)                      |
| OL-NH <sub>2</sub>  | 7.2      | -6.19    | -2.87    | S <sub>0</sub> → S <sub>1</sub> | 3.08                 | 403                        | 0.46 | H → L (0.69),<br>H-1 → L (-0.12)  |
| OL-H                | 4.7      | -7.07    | -3.14    | S <sub>0</sub> → S <sub>3</sub> | 3.67                 | 338                        | 0.13 | H-1 → L (0.30),<br>H-2 → L (0.63) |
| OLH <sup>b</sup>    | 4.3      | -6.71    | -3.04    | S <sub>0</sub> → S <sub>1</sub> | 3.37                 | 368                        | 0.36 | H → L (0.66),<br>H-1 → L (0.23)   |
| OL-OMe <sup>b</sup> | 5.2      | -6.58    | -2.98    | S <sub>0</sub> → S <sub>1</sub> | 3.31                 | 374                        | 0.45 | H → L (0.68),<br>H-1 → L (0.17)   |

<sup>a</sup> Configuration of excitation. H, H-*n* and L denote the HOMO, HOMO-*n* and LUMO, respectively.

<sup>b</sup> They have the conformations of the OH and OMe groups more stable than those reported in Ref 11.



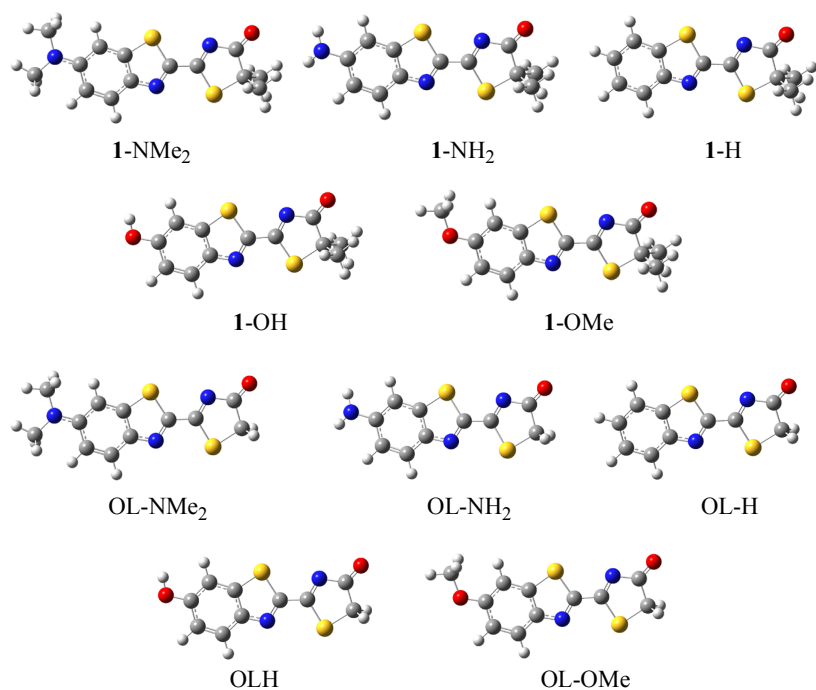

**Fig. S5** Optimized structures of oxyluciferin (OLH) and its analogs.

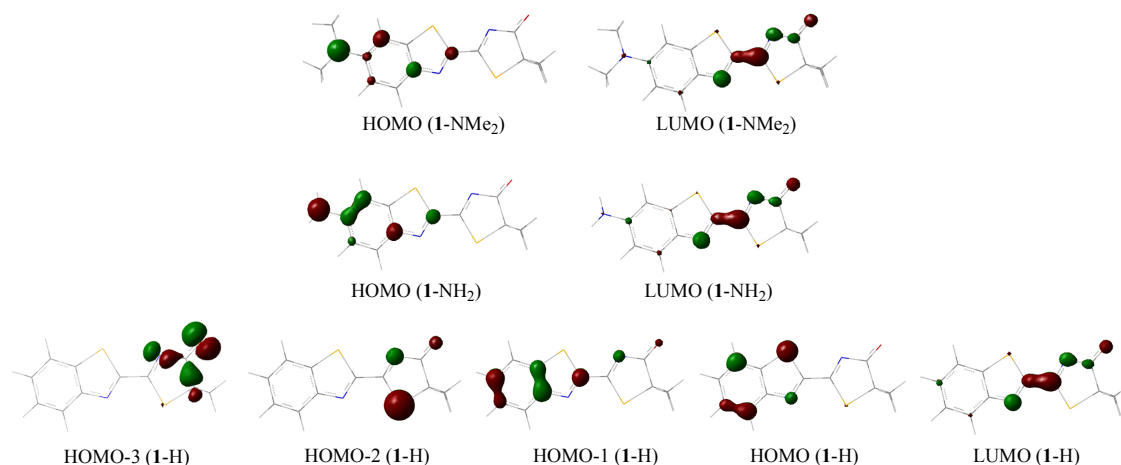

**Fig. S6** Frontier orbitals of 1-NMe<sub>2</sub>, 1-NH<sub>2</sub>, and 1-H.

## 6.1 Geometries of oxyluciferin analogs in gas phase optimized with DFT using B3LYP/6-31+G(d)

### 6.1.1 Cartesian Coordinates (in Å) of 1-NMe<sub>2</sub> (R = NMe<sub>2</sub>)

|   | x         | y         | z         |
|---|-----------|-----------|-----------|
| H | -4.903159 | -1.413766 | -1.698493 |
| H | -5.455282 | 0.232345  | -1.300806 |
| H | -3.972666 | -0.004722 | -2.251320 |

|   |           |           |           |
|---|-----------|-----------|-----------|
| H | -4.953502 | -2.028085 | 0.797228  |
| H | -5.507557 | -0.380338 | 1.185576  |
| H | -4.060073 | -1.043215 | 1.975453  |
| H | 2.975768  | -2.701940 | -0.469216 |
| H | 5.319075  | -2.023096 | -0.214532 |
| H | 4.080872  | 2.024456  | 0.758526  |
| O | -4.164129 | 1.900013  | 0.449887  |
| C | -4.573040 | -0.404689 | -1.428052 |
| C | -4.624098 | -1.011290 | 1.037854  |
| S | -2.194611 | -1.357397 | -0.303769 |
| C | -3.782398 | -0.424714 | -0.108734 |
| C | -3.343266 | 1.023637  | 0.258847  |
| N | -1.959436 | 1.210960  | 0.347173  |
| C | -1.303483 | 0.117397  | 0.092727  |
| N | 0.848170  | -0.996266 | -0.118702 |
| C | 0.146779  | 0.076219  | 0.127708  |
| S | 1.076203  | 1.536598  | 0.526083  |
| C | 2.535447  | 0.591699  | 0.337722  |
| C | 2.190082  | -0.743444 | -0.010085 |
| C | 3.224636  | -1.678088 | -0.206217 |
| C | 4.540928  | -1.285949 | -0.060525 |
| C | 4.895058  | 0.058504  | 0.285799  |
| C | 3.859585  | 0.999621  | 0.488646  |
| N | 6.220204  | 0.421478  | 0.415146  |
| C | 6.563342  | 1.775084  | 0.823259  |
| H | 6.168053  | 2.016511  | 1.821440  |
| H | 6.176254  | 2.517391  | 0.112160  |
| C | 7.275571  | -0.573447 | 0.286336  |
| H | 7.186867  | -1.369943 | 1.039711  |
| H | 8.241998  | -0.085783 | 0.423099  |
| H | 7.273326  | -1.038042 | -0.708675 |
| H | 7.649208  | 1.876702  | 0.854069  |

### 6.1.2 Cartesian Coordinates (in Å) of 1-NH<sub>2</sub> (R = NH<sub>2</sub>)

|   | x         | y         | z         |
|---|-----------|-----------|-----------|
| H | -4.983146 | -1.734886 | -1.283368 |
| H | -5.510906 | -0.033901 | -1.280857 |
| H | -4.051910 | -0.512513 | -2.175021 |
| H | -4.982518 | -1.735792 | 1.286558  |
| H | -5.510157 | -0.034775 | 1.285594  |
| H | -4.050714 | -0.514115 | 2.178617  |
| H | 2.905648  | -2.806788 | -0.000535 |
| H | 5.287599  | -2.099638 | -0.009741 |
| H | 4.115650  | 2.058960  | -0.007421 |
| O | -4.162658 | 1.984943  | 0.003579  |
| C | -4.637551 | -0.695380 | -1.268497 |
| C | -4.636854 | -0.696299 | 1.272267  |
| S | -2.243174 | -1.387373 | 0.000835  |

|   |           |           |           |
|---|-----------|-----------|-----------|
| C | -3.817384 | -0.411582 | 0.001782  |
| C | -3.356243 | 1.075702  | 0.002121  |
| N | -1.967691 | 1.257912  | 0.000635  |
| C | -1.330237 | 0.125517  | -0.000061 |
| N | 0.808479  | -1.034444 | -0.001022 |
| C | 0.122078  | 0.074128  | -0.001602 |
| S | 1.069367  | 1.575619  | -0.004944 |
| C | 2.515622  | 0.596523  | -0.004996 |
| C | 2.156059  | -0.780581 | -0.002966 |
| C | 3.174059  | -1.754698 | -0.001831 |
| C | 4.496371  | -1.353807 | -0.002096 |
| C | 4.852240  | 0.023977  | -0.001190 |
| C | 3.849910  | 1.005081  | -0.002018 |
| N | 6.193965  | 0.383527  | -0.056602 |
| H | 6.427504  | 1.325158  | 0.231484  |
| H | 6.863442  | -0.303629 | 0.265259  |

### 6.1.3 Cartesian Coordinates (in Å) of 1-H (R = H)

|   | x         | y         | z         |
|---|-----------|-----------|-----------|
| H | 4.570211  | -1.802167 | 1.285305  |
| H | 5.134501  | -0.113089 | 1.283602  |
| H | 3.665496  | -0.560349 | 2.177494  |
| H | 4.570390  | -1.802352 | -1.284825 |
| H | 5.134705  | -0.113281 | -1.283263 |
| H | 3.665831  | -0.560639 | -2.177320 |
| H | -3.315870 | -2.721379 | -0.000098 |
| H | -5.699392 | -1.965543 | -0.000145 |
| H | -4.458036 | 2.166367  | -0.000095 |
| O | 3.826749  | 1.936354  | 0.000292  |
| C | 4.247158  | -0.755559 | 1.271010  |
| C | 4.247351  | -0.755736 | -1.270721 |
| S | 1.839059  | -1.396012 | 0.000006  |
| C | 3.434319  | -0.453531 | 0.000061  |
| C | 3.005132  | 1.042544  | -0.000087 |
| N | 1.617204  | 1.253232  | 0.000006  |
| C | 0.961487  | 0.134057  | -0.000018 |
| N | -1.200303 | -0.983410 | -0.000049 |
| C | -0.498634 | 0.113452  | -0.000032 |
| S | -1.407733 | 1.630300  | -0.000027 |
| C | -2.873854 | 0.680674  | -0.000070 |
| C | -2.548913 | -0.703688 | -0.000070 |
| C | -3.574805 | -1.667022 | -0.000097 |
| C | -4.894237 | -1.236288 | -0.000123 |
| C | -5.206662 | 0.140254  | -0.000123 |
| C | -4.207241 | 1.109700  | -0.000097 |
| H | -6.247955 | 0.451084  | -0.000143 |

### 6.1.4 Cartesian Coordinates (in Å) of 1-OH (R = OH)

|   | x         | y         | z         |
|---|-----------|-----------|-----------|
| H | -4.976610 | -1.733509 | -1.284889 |
| H | -5.503058 | -0.032260 | -1.283401 |
| H | -4.044322 | -0.512320 | -2.177118 |
| H | -4.976504 | -1.733509 | 1.285054  |
| H | -5.502953 | -0.032260 | 1.283608  |
| H | -4.044144 | -0.512317 | 2.177205  |
| H | 2.912999  | -2.807240 | -0.000047 |
| H | 5.315032  | -2.081028 | 0.000032  |
| H | 4.126469  | 2.061199  | 0.000049  |
| H | 6.311424  | 1.272432  | 0.000104  |
| O | 6.175420  | 0.311569  | 0.000088  |
| O | -4.151170 | 1.987022  | 0.000038  |
| C | -4.630219 | -0.694347 | -1.270607 |
| C | -4.630115 | -0.694346 | 1.270743  |
| S | -2.236853 | -1.388323 | -0.000032 |
| C | -3.810581 | -0.410483 | 0.000034  |
| C | -3.347977 | 1.075900  | 0.000013  |
| N | -1.957290 | 1.255970  | -0.000024 |
| C | -1.324145 | 0.122411  | -0.000046 |
| N | 0.817407  | -1.035803 | -0.000069 |
| C | 0.131122  | 0.071058  | -0.000055 |
| S | 1.073233  | 1.573943  | -0.000066 |
| C | 2.519433  | 0.597522  | -0.000012 |
| C | 2.167078  | -0.779623 | -0.000042 |
| C | 3.183657  | -1.755940 | -0.000027 |
| C | 4.507263  | -1.356302 | 0.000019  |
| C | 4.841235  | 0.018487  | 0.000050  |
| C | 3.857377  | 1.007492  | 0.000033  |

### 6.1.5 Cartesian Coordinates (in Å) of 1-OMe (R = OMe)

|   | x         | y         | z         |
|---|-----------|-----------|-----------|
| H | 4.297985  | -4.582412 | 1.646835  |
| H | 4.243697  | -4.565269 | 3.426919  |
| H | 2.781933  | -4.955597 | 2.494738  |
| H | 5.222627  | -2.184330 | 1.651562  |
| H | 5.171121  | -2.174132 | 3.431875  |
| H | 4.352628  | -0.894626 | 2.509846  |
| H | -1.891283 | -0.857175 | -1.930140 |
| H | -4.235684 | 0.028130  | -2.016152 |
| H | -4.422166 | 0.112777  | 2.294701  |
| O | -5.717163 | 0.594403  | -0.069648 |
| O | 2.905604  | -2.672321 | 4.900476  |
| C | 3.680900  | -4.331441 | 2.516473  |
| C | 4.597428  | -1.961442 | 2.523054  |
| S | 2.237953  | -2.408589 | 1.087105  |
| C | 3.329983  | -2.833344 | 2.521875  |
| C | 2.471101  | -2.505596 | 3.778311  |

|   |           |           |           |
|---|-----------|-----------|-----------|
| N | 1.187864  | -2.015889 | 3.498406  |
| C | 0.971657  | -1.930378 | 2.220681  |
| N | -0.569894 | -1.348350 | 0.428449  |
| C | -0.298762 | -1.447947 | 1.699319  |
| S | -1.589219 | -0.957332 | 2.811237  |
| C | -2.571900 | -0.589319 | 1.416666  |
| C | -1.841314 | -0.868605 | 0.232026  |
| C | -2.447403 | -0.643786 | -1.022490 |
| C | -3.737576 | -0.156574 | -1.069686 |
| C | -4.457170 | 0.119121  | 0.122887  |
| C | -3.882662 | -0.093992 | 1.378314  |
| C | -6.519193 | 0.899982  | 1.066526  |
| H | -7.469587 | 1.258378  | 0.668642  |
| H | -6.691687 | 0.006874  | 1.680521  |
| H | -6.056989 | 1.686185  | 1.677033  |

### 6.1.6 Cartesian Coordinates (in Å) of OL-NMe<sub>2</sub> (R = NMe<sub>2</sub>)

|   | x         | y         | z         |
|---|-----------|-----------|-----------|
| H | 2.965100  | -2.698904 | -0.452545 |
| H | 5.310575  | -2.026349 | -0.202004 |
| H | 4.085344  | 2.025045  | 0.772915  |
| O | -4.186147 | 1.889167  | 0.441888  |
| S | -2.187084 | -1.359868 | -0.300706 |
| C | -3.742083 | -0.423498 | -0.124808 |
| C | -3.355140 | 1.024863  | 0.254858  |
| N | -1.969538 | 1.216004  | 0.354128  |
| C | -1.303215 | 0.130272  | 0.105822  |
| N | 0.843229  | -0.986583 | -0.098994 |
| C | 0.145359  | 0.088778  | 0.147046  |
| S | 1.079081  | 1.545357  | 0.545592  |
| C | 2.535300  | 0.595873  | 0.357174  |
| C | 2.185448  | -0.738522 | 0.009748  |
| C | 3.217224  | -1.676105 | -0.188648 |
| C | 4.534549  | -1.287540 | -0.045326 |
| C | 4.893014  | 0.055838  | 0.301959  |
| C | 3.860502  | 1.000379  | 0.505420  |
| N | 6.218435  | 0.414112  | 0.432305  |
| C | 6.567505  | 1.773469  | 0.815790  |
| H | 6.163555  | 2.035529  | 1.804733  |
| H | 6.193267  | 2.505751  | 0.086955  |
| C | 7.273460  | -0.575713 | 0.265971  |
| H | 7.190641  | -1.391541 | 0.998370  |
| H | 8.240593  | -0.091595 | 0.409669  |
| H | 7.263634  | -1.013803 | -0.741350 |
| H | 7.653605  | 1.867393  | 0.857889  |
| H | -4.371880 | -0.853459 | 0.658945  |
| H | -4.304364 | -0.419625 | -1.062715 |

### 6.1.7 Cartesian Coordinates (in Å) of OL-NH<sub>2</sub> (R = NH<sub>2</sub>)

|   | x         | y         | z         |
|---|-----------|-----------|-----------|
| H | 2.892942  | -2.802160 | -0.000624 |
| H | 5.277531  | -2.104881 | -0.008646 |
| H | 4.123059  | 2.058928  | -0.006991 |
| O | -4.184217 | 1.974789  | 0.003420  |
| S | -2.235307 | -1.387448 | 0.000964  |
| C | -3.777266 | -0.413198 | 0.002037  |
| C | -3.367665 | 1.077858  | 0.001980  |
| N | -1.976796 | 1.266160  | 0.000322  |
| C | -1.329011 | 0.142495  | -0.000171 |
| N | 0.803503  | -1.020556 | -0.001609 |
| C | 0.121871  | 0.091410  | -0.001989 |
| S | 1.074978  | 1.588138  | -0.005904 |
| C | 2.517169  | 0.603083  | -0.005408 |
| C | 2.151668  | -0.772710 | -0.003468 |
| C | 3.165712  | -1.751225 | -0.001871 |
| C | 4.489401  | -1.355817 | -0.001456 |
| C | 4.851106  | 0.020729  | -0.000364 |
| C | 3.852889  | 1.006224  | -0.001693 |
| N | 6.193688  | 0.374336  | -0.054765 |
| H | 6.432436  | 1.315567  | 0.230131  |
| H | 6.861530  | -0.315841 | 0.263843  |
| H | -4.377368 | -0.629867 | -0.886043 |
| H | -4.376405 | -0.630080 | 0.890701  |

### 6.1.8 Cartesian Coordinates (in Å) of OL-H (R = H)

|   | x         | y         | z         |
|---|-----------|-----------|-----------|
| H | -3.300880 | -2.719026 | -0.000081 |
| H | -5.688195 | -1.974762 | -0.000159 |
| H | -4.467683 | 2.163243  | -0.000123 |
| O | 3.847812  | 1.926857  | 0.000164  |
| S | 1.830742  | -1.394695 | 0.000086  |
| C | 3.393439  | -0.453388 | 0.000049  |
| C | 3.016461  | 1.045446  | 0.000063  |
| N | 1.626100  | 1.262249  | 0.000081  |
| C | 0.960353  | 0.151924  | -0.000001 |
| N | -1.194265 | -0.969891 | -0.000021 |
| C | -0.498489 | 0.131087  | -0.000019 |
| S | -1.414691 | 1.642354  | -0.000004 |
| C | -2.875964 | 0.685325  | -0.000073 |
| C | -2.544091 | -0.697333 | -0.000059 |
| C | -3.565171 | -1.666012 | -0.000090 |
| C | -4.886440 | -1.241827 | -0.000135 |
| C | -5.205736 | 0.133367  | -0.000149 |
| C | -4.211452 | 1.107932  | -0.000118 |
| H | -6.248447 | 0.439128  | -0.000181 |
| H | 3.988127  | -0.684049 | -0.888200 |

|   |          |           |          |
|---|----------|-----------|----------|
| H | 3.988127 | -0.684057 | 0.888298 |
|---|----------|-----------|----------|

### 6.1.9 Cartesian Coordinates (in Å) of OLH (R = OH)

|   | x         | y         | z         |
|---|-----------|-----------|-----------|
| H | -2.464702 | 2.764331  | 0.000009  |
| H | -4.826214 | 1.914672  | 0.000111  |
| H | -3.425740 | -2.160926 | 0.000031  |
| H | -5.650522 | -1.483994 | 0.000134  |
| O | -5.562072 | -0.517546 | 0.000135  |
| O | 4.863463  | -1.613409 | 0.000327  |
| S | 2.734358  | 1.637755  | -0.000074 |
| C | 4.327728  | 0.749579  | 0.000248  |
| C | 4.001198  | -0.761501 | -0.000263 |
| N | 2.620588  | -1.025497 | -0.000128 |
| C | 1.915288  | 0.061512  | -0.000078 |
| N | -0.281152 | 1.102223  | -0.000084 |
| C | 0.460826  | 0.031552  | -0.000082 |
| S | -0.402420 | -1.516890 | -0.000134 |
| C | -1.896793 | -0.616033 | -0.000026 |
| C | -1.615477 | 0.777411  | -0.000036 |
| C | -2.680940 | 1.700553  | 0.000015  |
| C | -3.981720 | 1.233089  | 0.000073  |
| C | -4.244886 | -0.157530 | 0.000085  |
| C | -3.211797 | -1.094767 | 0.000034  |
| H | 4.913930  | 0.999520  | 0.888898  |
| H | 4.914515  | 0.999947  | -0.887893 |

### 6.1.10 Cartesian Coordinates (in Å) of OL-OMe (R = OMe)

|   | x         | y         | z         |
|---|-----------|-----------|-----------|
| H | -1.883250 | -0.856894 | -1.927326 |
| H | -4.225738 | 0.033233  | -2.012857 |
| H | -4.415905 | 0.107535  | 2.298183  |
| O | -5.707418 | 0.596975  | -0.066161 |
| O | 2.951745  | -2.690014 | 4.870392  |
| S | 2.235994  | -2.420810 | 1.060103  |
| C | 3.308360  | -2.828952 | 2.478063  |
| C | 2.499326  | -2.519393 | 3.758580  |
| N | 1.210394  | -2.029445 | 3.489368  |
| C | 0.976113  | -1.940955 | 2.217657  |
| N | -0.565096 | -1.355890 | 0.431537  |
| C | -0.295079 | -1.457788 | 1.702837  |
| S | -1.584757 | -0.967402 | 2.814218  |
| C | -2.566221 | -0.595759 | 1.419831  |
| C | -1.835155 | -0.873886 | 0.234989  |
| C | -2.439818 | -0.644831 | -1.019662 |
| C | -3.728771 | -0.155031 | -1.066516 |
| C | -4.448988 | 0.119022  | 0.126329  |
| C | -3.875984 | -0.098164 | 1.381832  |

|   |           |           |          |
|---|-----------|-----------|----------|
| C | -6.510810 | 0.900911  | 1.069814 |
| H | -7.459839 | 1.262096  | 0.671310 |
| H | -6.685757 | 0.006288  | 1.680816 |
| H | -6.048031 | 1.684583  | 1.683042 |
| H | 4.220701  | -2.226308 | 2.464197 |
| H | 3.586898  | -3.886346 | 2.465332 |

## 6.2 TDDFT calculations for excitations to the first three singlet-excited states of oxyluciferin and its analogs using B3LYP/6-31+G(d)

The TDDFT calculations of **1-H**, **1-OH**, and **OL-H** showed that the  $S_0 \rightarrow S_1$  transition of **1-OH** and the  $S_0 \rightarrow S_1$  and  $S_0 \rightarrow S_2$  transitions of **1-H** and **OL-H** are forbidden, whose oscillator strengths ( $f$ ) are below 0.006. The  $S_0 \rightarrow S_1$  transitions of **1-H**, **1-OH**, and **OL-H** are of a  $\sigma-\pi^*$  type. While the  $S_0 \rightarrow S_2$  transitions of **1-H** and **OL-H** are of a  $\pi-\pi^*$  type, the nodes of the occupied and unoccupied orbitals related to the transition are perpendicular to each other. Therefore, we predict that these singlet states of **1-H**, **1-OH**, and **OL-H** don't participate in their photophysics.

### 6.2.1 Excitation of **1-NMe<sub>2</sub>** (**R = NMe<sub>2</sub>**)

Excitation energies and oscillator strengths:

|               |    |           |           |           |          |
|---------------|----|-----------|-----------|-----------|----------|
| Excited State | 1: | Singlet-A | 2.8321 eV | 437.79 nm | f=0.5530 |
| 80 -> 81      |    | 0.64087   |           |           |          |
| Excited State | 2: | Singlet-A | 3.3498 eV | 370.12 nm | f=0.0004 |
| 77 -> 81      |    | 0.68606   |           |           |          |
| 77 -> 84      |    | 0.10284   |           |           |          |
| Excited State | 3: | Singlet-A | 3.5715 eV | 347.14 nm | f=0.1196 |
| 78 -> 81      |    | -0.13491  |           |           |          |
| 79 -> 81      |    | 0.64960   |           |           |          |

### 6.2.2 Excitation of **1-NH<sub>2</sub>** (**R = NH<sub>2</sub>**)

Excitation energies and oscillator strengths:

|               |    |           |           |           |          |
|---------------|----|-----------|-----------|-----------|----------|
| Excited State | 1: | Singlet-A | 3.0894 eV | 401.33 nm | f=0.4874 |
| 71 -> 73      |    | -0.12564  |           |           |          |
| 72 -> 73      |    | 0.63611   |           |           |          |
| Excited State | 2: | Singlet-A | 3.3375 eV | 371.49 nm | f=0.0004 |
| 69 -> 73      |    | 0.68643   |           |           |          |
| Excited State | 3: | Singlet-A | 3.6005 eV | 344.36 nm | f=0.1392 |
| 70 -> 73      |    | -0.15291  |           |           |          |
| 71 -> 73      |    | 0.63867   |           |           |          |



### 6.2.3 Excitation of 1-H (R = H)

Excitation energies and oscillator strengths:

|               |    |           |           |           |          |
|---------------|----|-----------|-----------|-----------|----------|
| Excited State | 1: | Singlet-A | 3.2865 eV | 377.26 nm | f=0.0004 |
| 65 -> 69      |    | 0.68589   |           |           |          |
| 65 -> 71      |    | -0.10015  |           |           |          |
| Excited State | 2: | Singlet-A | 3.4263 eV | 361.87 nm | f=0.0047 |
| 68 -> 69      |    | 0.66707   |           |           |          |
| Excited State | 3: | Singlet-A | 3.6467 eV | 339.99 nm | f=0.1407 |
| 66 -> 69      |    | 0.61268   |           |           |          |
| 67 -> 69      |    | -0.25563  |           |           |          |

### 6.2.4 Excitation of 1-OH (R = OH)

Excitation energies and oscillator strengths:

|               |    |           |           |           |          |
|---------------|----|-----------|-----------|-----------|----------|
| Excited State | 1: | Singlet-A | 3.3140 eV | 374.12 nm | f=0.0004 |
| 69 -> 73      |    | 0.69454   |           |           |          |
| 69 -> 76      |    | -0.10721  |           |           |          |
| Excited State | 2: | Singlet-A | 3.3745 eV | 367.41 nm | f=0.3865 |
| 71 -> 73      |    | 0.23538   |           |           |          |
| 72 -> 73      |    | 0.66038   |           |           |          |
| Excited State | 3: | Singlet-A | 3.6160 eV | 342.87 nm | f=0.2028 |
| 70 -> 73      |    | -0.18401  |           |           |          |
| 71 -> 73      |    | 0.63760   |           |           |          |
| 72 -> 73      |    | -0.21959  |           |           |          |

### 6.2.5 Excitation of 1-OMe (R = OMe)

Excitation energies and oscillator strengths:

|               |    |           |           |           |          |
|---------------|----|-----------|-----------|-----------|----------|
| Excited State | 1: | Singlet-A | 3.3224 eV | 373.17 nm | f=0.4208 |
| 73 -> 77      |    | -0.25127  |           |           |          |
| 75 -> 77      |    | 0.16278   |           |           |          |
| 76 -> 77      |    | 0.63203   |           |           |          |
| Excited State | 2: | Singlet-A | 3.3250 eV | 372.89 nm | f=0.0646 |
| 73 -> 77      |    | 0.64735   |           |           |          |
| 73 -> 79      |    | 0.10139   |           |           |          |
| 76 -> 77      |    | 0.24686   |           |           |          |
| Excited State | 3: | Singlet-A | 3.5827 eV | 346.07 nm | f=0.1275 |
| 74 -> 77      |    | -0.14614  |           |           |          |
| 75 -> 77      |    | 0.66478   |           |           |          |
| 76 -> 77      |    | -0.16109  |           |           |          |

### 6.2.6 Excitation of OL-NMe<sub>2</sub> (R = NMe<sub>2</sub>)

Excitation energies and oscillator strengths:

|               |    |           |           |           |          |
|---------------|----|-----------|-----------|-----------|----------|
| Excited State | 1: | Singlet-A | 2.8230 eV | 439.19 nm | f=0.5254 |
| 72 -> 73      |    | 0.69933   |           |           |          |
| Excited State | 2: | Singlet-A | 3.4547 eV | 358.88 nm | f=0.0002 |
| 69 -> 73      |    | 0.69304   |           |           |          |
| 69 -> 76      |    | 0.11539   |           |           |          |
| Excited State | 3: | Singlet-A | 3.5662 eV | 347.66 nm | f=0.1227 |
| 70 -> 73      |    | -0.12082  |           |           |          |
| 71 -> 73      |    | 0.68198   |           |           |          |

### 6.2.7 Excitation of OL-NH<sub>2</sub> (R = NH<sub>2</sub>)

Excitation energies and oscillator strengths:

|               |    |           |           |           |          |
|---------------|----|-----------|-----------|-----------|----------|
| Excited State | 1: | Singlet-A | 3.0800 eV | 402.55 nm | f=0.4590 |
| 63 -> 65      |    | -0.12237  |           |           |          |
| 64 -> 65      |    | 0.69214   |           |           |          |
| Excited State | 2: | Singlet-A | 3.4433 eV | 360.07 nm | f=0.0002 |
| 61 -> 65      |    | 0.69299   |           |           |          |
| Excited State | 3: | Singlet-A | 3.5955 eV | 344.83 nm | f=0.1429 |
| 62 -> 65      |    | -0.14364  |           |           |          |
| 63 -> 65      |    | 0.67263   |           |           |          |
| 64 -> 65      |    | 0.11678   |           |           |          |

### 6.2.8 Excitation of OL-H (R = H)

Excitation energies and oscillator strengths:

|               |    |           |           |           |          |
|---------------|----|-----------|-----------|-----------|----------|
| Excited State | 1: | Singlet-A | 3.3972 eV | 364.97 nm | f=0.0002 |
| 57 -> 61      |    | 0.69261   |           |           |          |
| 57 -> 63      |    | 0.11070   |           |           |          |
| Excited State | 2: | Singlet-A | 3.4131 eV | 363.26 nm | f=0.0060 |
| 60 -> 61      |    | 0.69523   |           |           |          |
| Excited State | 3: | Singlet-A | 3.6696 eV | 337.87 nm | f=0.1349 |
| 58 -> 61      |    | 0.63197   |           |           |          |
| 59 -> 61      |    | 0.29756   |           |           |          |

### 6.2.9 Excitation of OLH (R = OH)

Excitation energies and oscillator strengths:

|               |    |           |           |           |          |
|---------------|----|-----------|-----------|-----------|----------|
| Excited State | 1: | Singlet-A | 3.3674 eV | 368.18 nm | f=0.3594 |
| 63 -> 65      |    | 0.22896   |           |           |          |
| 64 -> 65      |    | 0.66260   |           |           |          |
| Excited State | 2: | Singlet-A | 3.4231 eV | 362.20 nm | f=0.0002 |
| 61 -> 65      |    | 0.69304   |           |           |          |
| 61 -> 68      |    | 0.11379   |           |           |          |
| Excited State | 3: | Singlet-A | 3.6096 eV | 343.49 nm | f=0.1982 |
| 62 -> 65      |    | -0.17552  |           |           |          |
| 63 -> 65      |    | 0.64159   |           |           |          |
| 64 -> 65      |    | -0.21447  |           |           |          |

### 6.2.10 Excitation of OL-OMe (R = OMe)

Excitation energies and oscillator strengths:

|               |    |           |           |           |          |
|---------------|----|-----------|-----------|-----------|----------|
| Excited State | 1: | Singlet-A | 3.3148 eV | 374.03 nm | f=0.4522 |
| 67 -> 69      |    | 0.17004   |           |           |          |
| 68 -> 69      |    | 0.67977   |           |           |          |
| Excited State | 2: | Singlet-A | 3.4325 eV | 361.21 nm | f=0.0002 |
| 65 -> 69      |    | 0.69310   |           |           |          |
| 65 -> 71      |    | 0.11552   |           |           |          |
| Excited State | 3: | Singlet-A | 3.5748 eV | 346.83 nm | f=0.1281 |
| 66 -> 69      |    | -0.13349  |           |           |          |
| 67 -> 69      |    | 0.66787   |           |           |          |
| 68 -> 69      |    | -0.15901  |           |           |          |

### References

1. D. F. Eaton, Reference materials for fluorescence measurement, *Pure. Appl. Chem.*, 1988, **7**, 1107–1114.
2. *Gaussian 09*, M. J. Frisch, G. W. Trucks, H. B. Schlegel, G. E. Scuseria, M. A. Robb, J. R. Cheeseman, G. Scalmani, V. Barone, B. Mennucci, G. A. Petersson, H. Nakatsuji, M. Caricato, X. Li, H. P. Hratchian, A. F. Izmaylov, J. Bloino, G. Zheng, J. L. Sonnenberg, M. Hada, M. Ehara, K. Toyota, R. Fukuda, J. Hasegawa, M. Ishida, T. Nakajima, Y. Honda, O. Kitao, H. Nakai, T. Vreven, J. A. Montgomery, Jr., J. E. Peralta, F. Ogliaro, M. Bearpark, J. J. Heyd, E. Brothers, K. N. Kudin, V. N. Staroverov, R. Kobayashi, J. Normand, K. Raghavachari, A. Rendell, J. C. Burant, S. S. Iyengar, J. Tomasi, M. Cossi, N. Rega, J. M. Millam, M. Klene, J. E. Knox, J. B. Cross, V. Bakken, C. Adamo, J. Jaramillo, R. Gomperts, R. E. Stratmann, O. Yazyev, A. J. Austin, R. Cammi, C. Pomelli, J. W. Ochterski, R. L. Martin, K. Morokuma, V. G. Zakrzewski, G. A. Voth, P. Salvador, J. J. Dannenberg, S. Dapprich, A. D. Daniels, Ö. Farkas, J. B. Foresman, J. V. Ortiz, J. Cioslowski and D. J. Fox, Gaussian, Inc., Wallingford CT, 2009.
3. A. D. Becke, Density-functional thermochemistry. III. The role of exact exchange, *J. Chem. Phys.*, 1993, **98**, 5648–5652.

4. C. Lee, W. Yang and R. G. Parr, Development of the Colle-Salvetti correlation-energy formula into a functional of the electron density, *Phys. Rev. B*, 1988, **37**, 785–789.
5. P. J. Stephens, F. J. Devlin, C. F. Chabalowski and M. J. Frisch, Ab initio calculation of vibrational absorption and circular dichroism spectra using density functional force fields, *J. Phys. Chem.*, 1994, **98**, 11623–11627.
6. *GaussView*, R. Dennington, T. Keith and J. Millam, Semichem Inc., Shawnee Mission KS, Version 5, 2009.
7. T. Hirano, Y. Hasumi, K. Ohtsuka, S. Maki, H. Niwa, M. Yamaji and D. Hashizume, Spectroscopic studies of the light-color modulation mechanism of firefly (beetle) bioluminescence, *J. Am. Chem. Soc.*, 2009, **131**, 2385–2396.
8. G. R. Reddy, W. C. Thompson and S. C. Miller, Robust light emission from cyclic alkylaminoluciferin substrates for firefly luciferase, *J. Am. Chem. Soc.*, 2010, **132**, 13586–13587.
9. H. Takakura, R. Kojima, Y. Urano, T. Terai, K. Hanaoka, T. Tsuboi and T. Nagano, Aminoluciferins as functional bioluminogenic substrates of firefly luciferase, *Chem. Asian J.*, 2011, **6**, 1800–1810.
10. (a) T. Besson, M. –J. Dozias, J. Guillard and C. W. Rees, New route to 2-cyanobenzothiazoles via N-arylimino-1,2,3-dithiazoles, *J. Chem. Soc., Perkin Trans. I*, 1998, 3925–3926; (b) S. Frère, V. Thiéry, C. Bailly and T. Besson, Novel 6-substituted benzothiazol-2-yl indolo[1,2-c]quinazolines and benzimidazo[1,2-c]quinazolines, *Tetrahedron*, 2003, **59**, 773–779.
11. G. Orlova, J. D. Goddard and L. Y. Brovko, Theoretical study of the amazing firefly bioluminescence: The formation and structures of the light emitters, *J. Am. Chem. Soc.*, 2003, **125**, 6962–6971.
